# Supplementary material for: Addition of dipeptidyl peptidase-4 inhibitors to sulphonylureas and risk of hypoglycaemia: systematic review and meta-analysis
Source: PubMed Central journal article supplement — BMJ. 2016 May 3;353:i2231. doi: 10.1136/bmj.i2231 (PMC4854021; doi:10.1136/bmj.i2231), 2016-05-03
Supplement: salf026084.ww1_default.pdf [file salf026084.ww1_default.pdf]

## Supplement

### Salvo F, et al. Risk of hypoglycaemia related the addition of DPP-4 inhibitors to sulfonylureas: systematic review and meta-analysis.

| <i>Table of Contents</i>                                                                                           | <i>Page</i> |
|--------------------------------------------------------------------------------------------------------------------|-------------|
| Medline search terms and query. _____                                                                              | 2           |
| Studies excluded after full-text review: reasons for exclusion. _____                                              | 2           |
| eTable 1. Low and full daily dose of DPP4 inhibitors. _____                                                        | 3           |
| eTable 2. Trials used to calculate the Assumed Control Risk (ACR) of hypoglycaemia. _____                          | 4           |
| eFigure 1. Risk of hypoglycaemia including only studies with low or unknown risk of bias. _                        | 5           |
| eFigure 2. Risk of hypoglycaemia according including only studies with well-balanced sex ratio among groups. _____ | 6           |
| eFigure 3. Risk of hypoglycaemia according to presence of definition of hypoglycaemia. ____                        | 7           |
| Risk of bias assessment (Cochrane Collaboration tool) of included studies. _____                                   | 8           |
| References. _____                                                                                                  | 18          |

## **Medline Search terms**

((DPP-4[All Fields] AND ("inhibitors and inhibitors"[Subheading] OR ("inhibitors"[All Fields] AND "inhibitors"[All Fields]) OR "inhibitors and inhibitors"[All Fields] OR "inhibitors"[All Fields])) OR ("sitagliptin"[Supplementary Concept] OR "sitagliptin"[All Fields]) OR ("vildagliptin"[Supplementary Concept] OR "vildagliptin"[All Fields]) OR ("saxagliptin"[Supplementary Concept] OR "saxagliptin"[All Fields]) OR ("alogliptin"[Supplementary Concept] OR "alogliptin"[All Fields]) OR ("Linagliptin"[Supplementary Concept] OR "Linagliptin"[All Fields] OR "linagliptin"[All Fields])) AND ("randomized controlled trial"[Publication Type] OR "randomized controlled trials as topic"[MeSH Terms] OR "randomised clinical trials"[All Fields] OR "randomized clinical trials"[All Fields])

## **Studies excluded after full-text review: reasons for exclusion**

Forty-seven studies were excluded after the full text analysis: nine because included  $\leq 50$  patients in DPP4-i + SU group [1-9], seven because they were not RCTs,[10-16] one because there was no placebo group,[17] five because the patients were not treated with DPP4-i + SU,[18-22] three because they were extension studies,[23-25] two because they were sub-analyses or post-hoc analyses,[26, 27] 15 because they were pooled analyses without new data,[28-42] two because they were not assessable,[43, 44] and three because they did not report data on hypoglycaemia in patients treated with DPP4-i + SU and, after having e-mailed authors or study contacts, we did not received the requested data.[45-47]

**eTable 1. Low and full daily dose of DPP4 inhibitors.**

|              | <b>Low daily dose,<br/>mg</b> | <b>Full daily dose, mg</b> |
|--------------|-------------------------------|----------------------------|
| Alogliptin   | 6.5 or 12.5                   | 25                         |
| Linagliptin  | N/A                           | 5                          |
| Saxagliptin  | 2.5                           | 5                          |
| Sitagliptin  | N/A                           | 100                        |
| Vildagliptin | 50                            | 100                        |

N/A: not applicable

**eTable 2. Trial data used to calculate the Assumed Control Risk (ACR) of hypoglycaemia; from Hemmingsen *et al.*[48]**

| First author                      | Year | Patients with hypoglycaemia, n | Total patients, n | Treatment duration, months |
|-----------------------------------|------|--------------------------------|-------------------|----------------------------|
| Feinbock <i>et al.</i> [49]       | 2003 | 20                             | 111               | 6                          |
| Hermann <i>et al.</i> [50]        | 1991 | 12                             | 34                | 6                          |
| Rosenthal & Mauersberger [51]     | 2002 | 0                              | 37                | 6                          |
| Segal <i>et al.</i> [52]          | 1997 | 6                              | 69                | 6                          |
| Shihara <i>et al.</i> [53]        | 2011 | 7                              | 95                | 6                          |
| Spengler <i>et al.</i> [54]       | 1992 | 0                              | 36                | 6                          |
| Tosi <i>et al.</i> [55]           | 2003 | 2                              | 22                | 6                          |
| DeFronzo <i>et al.</i> [56]       | 1995 | 6                              | 209               | 7                          |
| Charbonnel <i>et al.</i> [57]     | 2005 | 63                             | 626               | 12                         |
| Hanefeld <i>et al.</i> [58]       | 2011 | 25                             | 207               | 12                         |
| Kaku <i>et al.</i> [59]           | 2011 | 55                             | 139               | 12                         |
| Nakamura <i>et al.</i> [60]       | 2006 | 6                              | 18                | 12                         |
| Nathan <i>et al.</i> [61]         | 1988 | 0                              | 16                | 9                          |
| St John Sutton <i>et al.</i> [62] | 2002 | 7                              | 99                | 12                         |
| Tan <i>et al.</i> [63]            | 2004 | 32                             | 109               | 12                         |
| van de Laar <i>et al.</i> [64]    | 2004 | 1                              | 50                | 7                          |
| ADOPT Study [65]                  | 2006 | 557                            | 1447              | 48                         |
| Alvarsson <i>et al.</i> [66]      | 2010 | 7                              | 26                | 72                         |
| APPROACH Study [67]               | 2010 | 96                             | 339               | 19                         |
| Birkeland <i>et al.</i> [68]      | 1994 | 0                              | 30                | 15                         |
| Birkeland <i>et al.</i> [69]      | 2002 | 0                              | 18                | 42                         |
| Derosa <i>et al.</i> [70]         | 2004 | 0                              | 81                | 14                         |
| Foley & Sreenan [71]              | 2009 | 14                             | 546               | 24                         |
| Jain <i>et al.</i> [72]           | 2006 | 61                             | 251               | 13                         |
| LEAD-3 <i>et al.</i> [73]         | 2006 | 60                             | 248               | 45                         |
| UKPDS 33 Study[74]                | 1998 | 177                            | 1234              | 120                        |
| UKPDS 34 Study [75]               | 1998 | 52                             | 277               | 128                        |

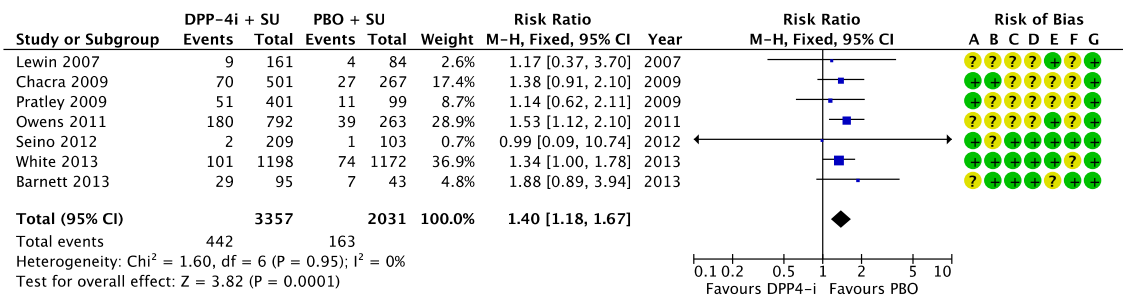

**Risk of bias legend**

- (A) Random sequence generation (selection bias)
- (B) Allocation concealment (selection bias)
- (C) Blinding of participants and personnel (performance bias)
- (D) Blinding of outcome assessment (detection bias)
- (E) Incomplete outcome data (attrition bias)
- (F) Selective reporting (reporting bias)
- (G) Other bias

**eFigure 1. Forest plot of the risk of hypoglycaemia in patients treated with DPP4-i + SU in comparison with those treated with placebo + SU and included in studies with low or unknown risk of bias.** Risk ratios (RR) calculated for individual randomized controlled trials (RCTs) with 95% confidence intervals (CI) are presented. Arrows indicate the CI exceeding the limits of the graph. Pooled RR is also presented (black diamond). Statistical heterogeneity among studies was evaluated with the Q statistic ( $p < 0.10$  considered significant), and the proportion of total variation contributed by between-study variance was estimated by using the  $I^2$  index. The risk of bias for each included study is presented as different coloured circles: green represents a low risk of bias, and yellow an unclear risk of bias.

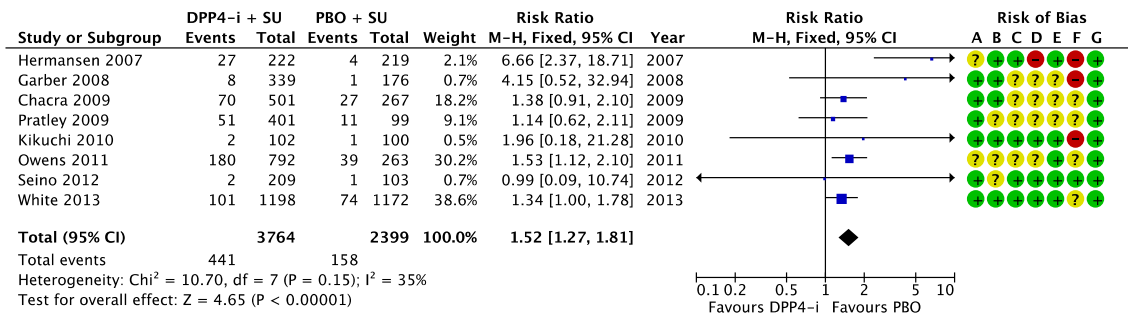

**Risk of bias legend**

- (A) Random sequence generation (selection bias)
- (B) Allocation concealment (selection bias)
- (C) Blinding of participants and personnel (performance bias)
- (D) Blinding of outcome assessment (detection bias)
- (E) Incomplete outcome data (attrition bias)
- (F) Selective reporting (reporting bias)
- (G) Other bias

**eFigure 2. Forest plot of the risk of hypoglycaemia in patients treated with DPP4-i + SU in comparison with those treated with placebo + SU including RCTs with a well-balanced sex ratio among groups.** Risk ratios (RR) calculated for individual randomised controlled trials (RCTs) with 95% confidence intervals (CI) are presented. Arrows indicate the CI exceeding the limits of the graph. Pooled RR is also presented (black diamond). Statistical heterogeneity among studies was evaluated with the Q statistic ( $p < 0.10$  considered significant), and the proportion of total variation contributed by between-study variance was estimated by using the  $I^2$  index. The risk of bias for each included study is presented as different coloured circles: green represents a low risk of bias, red a high risk of bias, and yellow an unclear risk of bias.

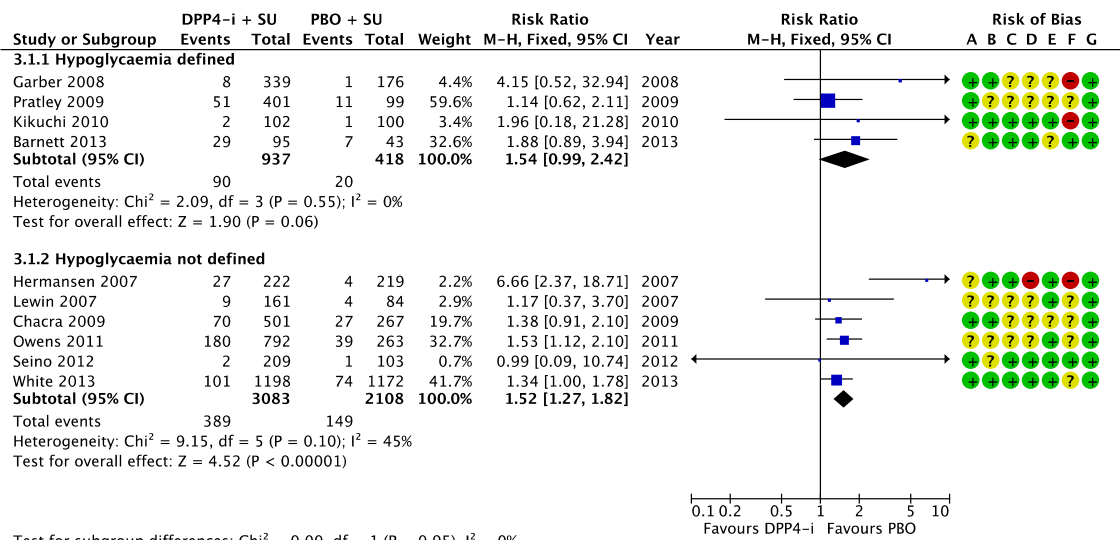

Test for subgroup differences: Chi<sup>2</sup> = 0.00, df = 1 (P = 0.95), I<sup>2</sup> = 0%

**Risk of bias legend**

- (A) Random sequence generation (selection bias)
- (B) Allocation concealment (selection bias)
- (C) Blinding of participants and personnel (performance bias)
- (D) Blinding of outcome assessment (detection bias)
- (E) Incomplete outcome data (attrition bias)
- (F) Selective reporting (reporting bias)
- (G) Other bias

**eFigure 3. Forest plot of the risk of hypoglycaemia in patients treated with DPP4-i + SU in comparison with those treated with placebo + SU according to the presence of a definition of hypoglycaemia in the included RCTs.** Risk ratios (RR) calculated for individual randomized controlled trials (RCTs) with 95% confidence intervals (CI) are presented. Arrows indicate the CI exceeding the limits of the graph. Pooled RR is also presented (black diamond). Statistical heterogeneity among studies was evaluated with the Q statistic (p<0.10 considered significant), and the proportion of total variation contributed by between-study variance was estimated by using the I<sup>2</sup> index. The risk of bias for each study included is presented as different coloured circles: green represents a low risk of bias, red a high risk of bias, and yellow an unclear risk of bias.

**Risk of bias assessment (Cochrane Collaboration tool) of included studies.**

Barnett *et al.*[76]

| Bias                                                      | Authors' judgement | Support for judgement                                                                                                                                                                                             |
|-----------------------------------------------------------|--------------------|-------------------------------------------------------------------------------------------------------------------------------------------------------------------------------------------------------------------|
| Random sequence generation (selection bias)               | Unclear risk       | Gender ratio differed among groups and SU treated patients were more represented in placebo group. It is unclear how this could affect the results                                                                |
| Allocation concealment (selection bias)                   | Low risk           | Allocation concealed using a central interactive voice–web response system                                                                                                                                        |
| Blinding of participants and personnel (performance bias) | Low risk           | Linagliptin and placebo tablets were identical in appearance, and investigators and patients were masked to treatment assignment throughout the study                                                             |
| Blinding of outcome assessment (detection bias)           | Low risk           | Adverse events were reviewed by an independent clinical endpoint committee (CEC), consisting of three academic cardiologists and three academic neurologists who were masked to assignment                        |
| Incomplete outcome data (attrition bias)                  | Unclear risk       | Patients in linagliptin group discontinued more frequently the medication because of adverse events in comparison with placebo (8 patients <i>vs.</i> 1 patient). It is unclear how this could affect the results |
| Selective reporting (reporting bias)                      | Low risk           | Hypoglycaemia was defined as plasma glucose of 3.9 mmol/L or less, with or without symptoms                                                                                                                       |
| Other bias                                                | Low risk           | None detected                                                                                                                                                                                                     |



Chachra *et al.*[77]

| Bias                                                      | Authors' judgement | Support for judgement                                                                                                                                                                                                                   |
|-----------------------------------------------------------|--------------------|-----------------------------------------------------------------------------------------------------------------------------------------------------------------------------------------------------------------------------------------|
| Random sequence generation (selection bias)               | Low risk           | Patients were randomised equally in the groups with a block size of three                                                                                                                                                               |
| Allocation concealment (selection bias)                   | Low risk           | Interactive Voice Response System                                                                                                                                                                                                       |
| Blinding of participants and personnel (performance bias) | Unclear risk       | “Throughout the study, double-blind study medication were taken twice daily, before the morning and evening meals to allow the glyburide dose to be split between morning and evening.” It is unclear how this could affect the results |
| Blinding of outcome assessment (detection bias)           | Unclear risk       | Not detailed                                                                                                                                                                                                                            |
| Incomplete outcome data (attrition bias)                  | Unclear risk       | In the placebo arm, more patients withdrew from the study, mostly because of lack of efficacy. It is unclear how this could affect the results                                                                                          |
| Selective reporting (reporting bias)                      | Unclear risk       | Hypoglycaemia was not clearly defined                                                                                                                                                                                                   |
| Other bias                                                | Low risk           | None detected                                                                                                                                                                                                                           |

Garber *et al.*[78]

| Bias                                                      | Authors' judgement | Support for judgement                                                                                                                                                                                      |
|-----------------------------------------------------------|--------------------|------------------------------------------------------------------------------------------------------------------------------------------------------------------------------------------------------------|
| Random sequence generation (selection bias)               | Low risk           | A randomization list was produced using a health authority–inspected and validated system that automates the random assignment of treatment groups to randomization numbers in the specified ratio.        |
| Allocation concealment (selection bias)                   | Low risk           | A randomization list was produced using a health authority–inspected and validated system that automates the random assignment of treatment groups to randomization numbers in the specified ratio.        |
| Blinding of participants and personnel (performance bias) | Unclear risk       | No indication of how the double blinding was ensured reported in the full-text                                                                                                                             |
| Blinding of outcome assessment (detection bias)           | Unclear risk       | Not detailed                                                                                                                                                                                               |
| Incomplete outcome data (attrition bias)                  | Unclear risk       | More patients in placebo group discontinued the study than did so in the other groups, mostly for unsatisfactory therapeutic effect or consent withdrawal. It is unclear how this could affect the results |
| Selective reporting (reporting bias)                      | High risk          | Only symptomatic hypoglycaemia was reported, and cut-off values were not used.                                                                                                                             |
| Other bias                                                | Low risk           | None detected                                                                                                                                                                                              |

Hermansen *et al.*[79]

| Bias                                                      | Authors' judgement | Support for judgement                                                                                                    |
|-----------------------------------------------------------|--------------------|--------------------------------------------------------------------------------------------------------------------------|
| Random sequence generation (selection bias)               | Unclear risk       | Randomized study                                                                                                         |
| Allocation concealment (selection bias)                   | Low risk           | Patients were randomized through an interactive voice response system Interactive Voice Response System                  |
| Blinding of participants and personnel (performance bias) | Low risk           | Double-blind study and "All assays were performed by technicians blinded to treatment sequence"                          |
| Blinding of outcome assessment (detection bias)           | High risk          | The severity and relationship to study drug for any AE were determined by the investigator                               |
| Incomplete outcome data (attrition bias)                  | Low risk           | Equally distributed, no major differences. "Missing data were handled using the last observation-carried forward method" |
| Selective reporting (reporting bias)                      | High risk          | The investigator judged the severity and relation with study drugs of the adverse event, without any mention of masking  |
| Other bias                                                | Low risk           | None detected                                                                                                            |

Kikuchi *et al.*[80]

| Bias                                                      | Authors' judgement | Support for judgement                                                                                                                                                                                                                                                                                                    |
|-----------------------------------------------------------|--------------------|--------------------------------------------------------------------------------------------------------------------------------------------------------------------------------------------------------------------------------------------------------------------------------------------------------------------------|
| Random sequence generation (selection bias)               | Low risk           | Dynamic randomization was used to adjust for demographic differences between the treatment groups. A maximum difference of two subjects was permitted between the treatment groups at each study center (29 centers), and the six dose levels of glimepiride were used as an adjustment factor.                          |
| Allocation concealment (selection bias)                   | Low risk           | Dynamic randomization was used to adjust for demographic differences between the treatment groups.                                                                                                                                                                                                                       |
| Blinding of participants and personnel (performance bias) | Low risk           | Double-blind placebo-controlled study; dose adjustments to the treatment were not allowed at anytime after randomization.                                                                                                                                                                                                |
| Blinding of outcome assessment (detection bias)           | Low risk           | Patients were required to record the event and associated information such as glucose value and time of occurrence in the study diary. Haematology, biochemistry and urinalysis were performed at each scheduled visit. All laboratory assessments were processed at a central testing laboratory to ensure consistency. |
| Incomplete outcome data (attrition bias)                  | Low risk           | The drop out rate was well balanced among groups                                                                                                                                                                                                                                                                         |
| Selective reporting (reporting bias)                      | High risk          | Only symptomatic hypoglycaemia was included                                                                                                                                                                                                                                                                              |
| Other bias                                                | Low risk           | None detected                                                                                                                                                                                                                                                                                                            |

Lewin *et al.*[81]

| Bias                                                      | Authors' judgement | Support for judgement                            |
|-----------------------------------------------------------|--------------------|--------------------------------------------------|
| Random sequence generation (selection bias)               | Unclear risk       | Not detailed                                     |
| Allocation concealment (selection bias)                   | Unclear risk       | Not detailed                                     |
| Blinding of participants and personnel (performance bias) | Unclear risk       | Not detailed                                     |
| Blinding of outcome assessment (detection bias)           | Unclear risk       | Not detailed                                     |
| Incomplete outcome data (attrition bias)                  | Low risk           | The drop out rate was well balanced among groups |
| Selective reporting (reporting bias)                      | Unclear risk       | Not detailed                                     |
| Other bias                                                | Low risk           | None detected                                    |

Owens *et al.*[82]

| Bias                                                      | Authors' judgement | Support for judgement                            |
|-----------------------------------------------------------|--------------------|--------------------------------------------------|
| Random sequence generation (selection bias)               | Unclear risk       | Not detailed                                     |
| Allocation concealment (selection bias)                   | Unclear risk       | Not detailed                                     |
| Blinding of participants and personnel (performance bias) | Unclear risk       | Not detailed                                     |
| Blinding of outcome assessment (detection bias)           | Unclear risk       | Not detailed                                     |
| Incomplete outcome data (attrition bias)                  | Low risk           | The drop out rate was well balanced among groups |
| Selective reporting (reporting bias)                      | Unclear risk       | Not detailed                                     |
| Other bias                                                | Low risk           | None detected                                    |

Pratley *et al.*[83]

| Bias                                                      | Authors' judgement | Support for judgement                                                                                                        |
|-----------------------------------------------------------|--------------------|------------------------------------------------------------------------------------------------------------------------------|
| Random sequence generation (selection bias)               | Low risk           | Patients were randomised with a permuted block schedule, which was stratified for HbA1c at week                              |
| Allocation concealment (selection bias)                   | Unclear risk       | Not detailed                                                                                                                 |
| Blinding of participants and personnel (performance bias) | Unclear risk       | Not detailed                                                                                                                 |
| Blinding of outcome assessment (detection bias)           | Unclear risk       | Not detailed                                                                                                                 |
| Incomplete outcome data (attrition bias)                  | High risk          | More patients in placebo group discontinued the treatment because of an hyperglycaemia                                       |
| Selective reporting (reporting bias)                      | Unclear risk       | The cut off of hypoglycaemia varied in symptomatic or asymptomatic patients. It is unclear how this could affect the results |
| Other bias                                                | Low risk           | None detected                                                                                                                |

Seino *et al.*[84]

| Bias                                                      | Authors' judgement | Support for judgement                                                                                                 |
|-----------------------------------------------------------|--------------------|-----------------------------------------------------------------------------------------------------------------------|
| Random sequence generation (selection bias)               | Low risk           | Patients were randomized 1:1:1 to each group with the daily dose of glimepiride being used as a randomization factor. |
| Allocation concealment (selection bias)                   | Unclear risk       | Not detailed                                                                                                          |
| Blinding of participants and personnel (performance bias) | Low risk           | Double blind (Subject, Caregiver, Investigator, Outcomes Assessor)                                                    |
| Blinding of outcome assessment (detection bias)           | Low risk           | Assessor was blinded (from clinicaltrials.gov)                                                                        |
| Incomplete outcome data (attrition bias)                  | Low risk           | The drop out rate was well balanced among groups                                                                      |
| Selective reporting (reporting bias)                      | Low risk           | All clinical laboratory tests were carried out at a central independent laboratory                                    |
| Other bias                                                | Low risk           | None detected                                                                                                         |



White *et al.*[85]

| Bias                                                      | Authors' judgement | Support for judgement                                                                                                      |
|-----------------------------------------------------------|--------------------|----------------------------------------------------------------------------------------------------------------------------|
| Random sequence generation (selection bias)               | Low risk           | Interactive Voice Response System, randomization was stratified based on country and screening renal function              |
| Allocation concealment (selection bias)                   | Low risk           | Interactive Voice Response System                                                                                          |
| Blinding of participants and personnel (performance bias) | Low risk           | Blinding will be maintained throughout the study by use of active drugs and matching placebo tablets of similar appearance |
| Blinding of outcome assessment (detection bias)           | Low risk           | Independent statistician, blinded data                                                                                     |
| Incomplete outcome data (attrition bias)                  | Low risk           | The drop out rate was well balanced among groups                                                                           |
| Selective reporting (reporting bias)                      | Unclear risk       | No definition of hypoglycaemia is reported                                                                                 |
| Other bias                                                | Low risk           | None detected                                                                                                              |

## References – Supplement

1. Chien MN, Lee CC, Chen WC, Liu SC, Leung CH, Wang CH. Effect of sitagliptin as add-on therapy in elderly type 2 diabetes patients with inadequate glycemic control in Taiwan. *Int J Gerontol* 2011;5:103-06.
2. Derosa G, Ragonesi PD, Fogari E, Cicero AFG, Bianchi L, Bonaventura A, *et al.* Sitagliptin added to previously taken antidiabetic agents on insulin resistance and lipid profile: A 2-year study evaluation. *Fundam Clin Pharmacol* 2012.
3. Eliasson B, Möller-Goede D, Eeg-Olofsson K, Wilson C, Cederholm J, Fleck P, *et al.* Lowering of postprandial lipids in individuals with type 2 diabetes treated with alogliptin and/or pioglitazone: A randomised double-blind placebo-controlled study. *Diabetologia* 2012;55:915-25.
4. McGill JB, Sloan L, Newman J, Patel S, Sauce C, von Eynatten M, *et al.* Long-term efficacy and safety of linagliptin in patients with type 2 diabetes and severe renal impairment: a 1-year, randomized, double-blind, placebo-controlled study. *Diabetes Care* 2013;36:237-44.
5. Nowicki M, Rychlik I, Haller H, Warren M, Suchower L, Gause-Nilsson I, *et al.* Long-term treatment with the dipeptidyl peptidase-4 inhibitor saxagliptin in patients with type 2 diabetes mellitus and renal impairment: a randomised controlled 52-week efficacy and safety study. *Int J Clin Pract* 2011;65:1230-9.
6. Nowicki M, Rychlik I, Haller H, Warren ML, Suchower L, Gause-Nilsson I. Saxagliptin improves glycaemic control and is well tolerated in patients with type 2 diabetes mellitus and renal impairment. *Diabetes Obes Metab* 2011;13:523-32.
7. Stafford S, Elahi D, Meneilly GS. Effect of the dipeptidyl peptidase-4 inhibitor sitagliptin in older adults with type 2 diabetes mellitus. *J Am Geriatr Soc* 2011;59:1148-9.
8. Strain WD, Lukashevich V, Kothny W, Hoellinger MJ, Paldanius PM. Individualised treatment targets for elderly patients with type 2 diabetes using vildagliptin add-on or lone therapy (INTERVAL): a 24 week, randomised, double-blind, placebo-controlled study. *Lancet* 2013;382:409-16.
9. Thrasher J, Daniels K, Patel S, Whetteckey J, Woerle HJ. Efficacy and Safety of Linagliptin in Black/African American Patients with Type 2 Diabetes: A 6-month, Randomized, Double-blind, Placebo-controlled Study. *Endocr Pract* 2014;20:412-20.
10. Chung HS, Lee MK. Efficacy of sitagliptin when added to ongoing therapy in Korean subjects with type 2 diabetes mellitus. *Diabetes Metab J* 2011;35:411-17.
11. Freeman MK. Efficacy and safety of linagliptin (Tradjenta) in adults with type-2 diabetes mellitus. *P and T* 2011;36:807-12+42.
12. Harashima SI, Ogura M, Tanaka D, Fukushima T, Wang Y, Koizumi T, *et al.* Sitagliptin add-on to low dosage sulphonylureas: Efficacy and safety of combination therapy on glycaemic control and insulin secretion capacity in type 2 diabetes. *Int J Clin Pract* 2012;66:465-76.
13. Leibovitz E, Gottlieb S, Goldenberg I, Gevriellov-Yusim N, Matetzky S, Gavish D. Sitagliptin pretreatment in diabetes patients presenting with acute coronary syndrome: Results from the Acute Coronary Syndrome Israeli Survey (ACSIS). *Cardiovasc Diabetol* 2013;12.
14. Maeda H, Kubota A, Tanaka Y, Terauchi Y, Matsuba I. The safety, efficacy and predictors for HbA1c reduction of sitagliptin in the treatment of Japanese type 2 diabetes. *Diabetes Res Clin Pract* 2012;95:e20-e22.
15. Moon JS, Won KC. The efficacy of vildagliptin in Korean patients with type 2 diabetes. *Diabetes Metab J* 2013;37:36-39.
16. Signorovitch JE, Wu EQ, Swallow E, Kantor E, Fan L, Gruenberger JB. Comparative efficacy of vildagliptin and sitagliptin in Japanese patients with type 2 diabetes

- mellitus: a matching-adjusted indirect comparison of randomized trials. *Clin Drug Investig* 2011;31:665-74.
17. Inagaki N, Watada H, Murai M, Kagimura T, Gong Y, Patel S, *et al.* Linagliptin provides effective, well-tolerated add-on therapy to pre-existing oral antidiabetic therapy over 1 year in Japanese patients with type 2 diabetes. *Diabetes Obes Metab* 2013;15:833-43.
  18. Del Prato S, Barnett AH, Huisman H, Neubacher D, Woerle HJ, Dugi KA. Effect of linagliptin monotherapy on glycaemic control and markers of beta-cell function in patients with inadequately controlled type 2 diabetes: a randomized controlled trial. *Diabetes Obes Metab* 2011;13:258-67.
  19. Iwamoto Y, Taniguchi T, Nonaka K, Okamoto T, Okuyama K, Arjona Ferreira JC, *et al.* Dose-ranging efficacy of sitagliptin, a dipeptidyl peptidase-4 inhibitor, in Japanese patients with type 2 diabetes mellitus. *Endocr J* 2010;57:383-94.
  20. Kikuchi M, Abe N, Kato M, Terao S, Mimori N, Tachibana H. Vildagliptin dose-dependently improves glycemic control in Japanese patients with type 2 diabetes mellitus. *Diabetes Res Clin Pract* 2009;83:233-40.
  21. Nonaka K, Kakikawa T, Sato A, Okuyama K, Fujimoto G, Kato N, *et al.* Efficacy and safety of sitagliptin monotherapy in Japanese patients with type 2 diabetes. *Diabetes Res Clin Pract* 2008;79:291-8.
  22. Rauch T, Graefe-Mody U, Deacon CF, Ring A, Holst JJ, Woerle HJ, *et al.* Linagliptin increases incretin levels, lowers glucagon, and improves glycemic control in type 2 diabetes mellitus. *Diabetes Ther* 2012;3:1-14.
  23. Chacra AR, Tan GH, Ravichandran S, List J, Chen R. Safety and efficacy of saxagliptin in combination with submaximal sulphonylurea versus up-titrated sulphonylurea over 76 weeks. *Diab Vasc Dis Res* 2011;8:150-9.
  24. Gomis R, Owens DR, Taskinen MR, Del Prato S, Patel S, Pivovarova A, *et al.* Long-term safety and efficacy of linagliptin as monotherapy or in combination with other oral glucose-lowering agents in 2121 subjects with type 2 diabetes: Up to 2 years exposure in 24-week phase III trials followed by a 78-week open-label extension. *Int J Clin Pract* 2012;66:731-40.
  25. Kothny W, Shao Q, Groop PH, Lukashevich V. One-year safety, tolerability and efficacy of vildagliptin in patients with type 2 diabetes and moderate or severe renal impairment. *Diabetes Obes Metab* 2012;14:1032-9.
  26. Lukashevich V, Schweizer A, Foley JE, Dickinson S, Groop PH, Kothny W. Efficacy of vildagliptin in combination with insulin in patients with type 2 diabetes and severe renal impairment. *Vasc Health Risk Manag* 2013;9:21-8.
  27. Zeng Z, Yang JK, Tong N, Yan S, Zhang X, Gong Y, *et al.* Efficacy and safety of linagliptin added to metformin and sulphonylurea in Chinese patients with type 2 diabetes: A sub-analysis of data from a randomised clinical trial. *Curr Med Res Opin* 2013;29:921-29.
  28. Efficacy of saxagliptin according to patient baseline characteristics: a pooled analysis of three add-on pivotal randomised phase 3 clinical trials. 46th Annual Meeting of the European-Association-for-the- Study-of-Diabetes (EASD); 2010 Sep. *Diabetologia*.
  29. Cook W, Bryzinski B, Slater J, Frederich R, Allen E. Saxagliptin efficacy and safety in patients with type 2 diabetes mellitus and cardiovascular disease history or cardiovascular risk factors: results of a pooled analysis of phase 3 clinical trials. *Postgrad Med* 2013;125:145-54.
  30. Del Prato S, Taskinen MR, Owens DR, Von Eynatten M, Emser A, Gong Y, *et al.* Efficacy and safety of linagliptin in subjects with type 2 diabetes mellitus and poor glycemic control: Pooled analysis of data from three placebo-controlled phase III trials. *J Diabetes Complications* 2013;27:274-79.

31. Doucet J, Chacra A, Maheux P, Lu J, Harris S, Rosenstock J. Efficacy and safety of saxagliptin in older patients with type 2 diabetes mellitus. *Curr Med Res Opin* 2011;27:863-9.
32. Engel SS, Golm GT, Shapiro D, Davies MJ, Kaufman KD, Goldstein BJ. Cardiovascular safety of sitagliptin in patients with type 2 diabetes mellitus: a pooled analysis. *Cardiovasc Diabetol* 2013;12:3.
33. Karyekar C, Donovan M, Allen E, Fleming D, Ravichandran S, Chen R. Efficacy and safety of saxagliptin combination therapy in US patients with type 2 diabetes. *Postgrad Med* 2011;123:63-70.
34. Karyekar CS, Ravichandran S, Allen E, Fleming D, Frederick R. Tolerability and efficacy of glycemic control with saxagliptin in older patients (aged ≥ 65 years) with inadequately controlled type 2 diabetes mellitus. *Clin Interv Aging* 2013;8:419-30.
35. Maheux P, Donovan M, Allen E, Berglund N, Bouzamondo H. Efficacy of saxagliptin in relation to baseline HbA(1c) in a pooled analysis of 3 add-on pivotal randomised phase 3 clinical trials. *Diabetologia* 2010;53.
36. Pratley RE, McCall T, Fleck PR, Wilson CA, Mekki Q. Alogliptin use in elderly people: a pooled analysis from phase 2 and 3 studies. *J Am Geriatr Soc* 2009;57:2011-9.
37. Rosenstock J, Fitchet M. Vildagliptin: Clinical trials programme in monotherapy and combination therapy for type 2 diabetes. *Int J Clin Pract* 2008;62:15-23.
38. Schernthaner G, Barnett AH, Emser A, Patel S, Troost J, Woerle HJ, *et al.* Safety and tolerability of linagliptin: a pooled analysis of data from randomized controlled trials in 3572 patients with type 2 diabetes mellitus. *Diabetes Obes Metab* 2012;14:470-8.
39. Schweizer A, Dejager S, Foley JE, Kothny W. Assessing the general safety and tolerability of vildagliptin: Value of pooled analyses from a large safety database versus evaluation of individual studies. *Vasc Health Risk Manag* 2011;7:49-57.
40. von Eynatten M, Gong Y, Emser A, Woerle HJ. Efficacy and safety of linagliptin in type 2 diabetes subjects at high risk for renal and cardiovascular disease: A pooled analysis of six phase III clinical trials. *Cardiovasc Diabetol* 2013;12.
41. White WB, Pratley R, Fleck P, Munsaka M, Hisada M, Wilson C, *et al.* Cardiovascular safety of the dipetidyl peptidase-4 inhibitor alogliptin in type 2 diabetes mellitus. *Diabetes Obes Metab* 2013;15:668-73.
42. Williams-Herman D, Engel SS, Round E, Johnson J, Golm GT, Guo H, *et al.* Safety and tolerability of sitagliptin in clinical studies: A pooled analysis of data from 10,246 patients with type 2 diabetes. *BMC Endocr Disord* 2010;10.
43. Efficacy and Safety Study of Linagliptin (5 mg Administered Orally Once Daily) Over 24 Weeks, in Drug naïve or Previously Treated Type 2 Diabetic Patients With Insufficient Glycaemic Control (Study number: NCT01214239). Boehringer Ingelheim Pharmaceuticals, 2013.
44. Safety and Efficacy in Type 2 Diabetic Patients With Severe Chronic Renal Impairment, 5 mg BI 1356 (Linagliptin) vs. Placebo, Insulin Background Inclusive(Study Number NCT00800683). Boehringer Ingelheim Pharmaceuticals, 2014.
45. A 24-week, Multicentre, Randomised, Double-Blind, Placebo-Controlled Phase IIIb Study to Evaluate Efficacy and Safety of Saxagliptin in Combination With Metformin and Sulfonylurea in Subjects With Type 2 Diabetes Who Have Inadequate Glycaemic Control With Combination of Metformin and Sulfonylurea. Study number: NCT01128153, 2012.
46. Lukashevich V, Schweizer A, Shao Q, Groop PH, Kothny W. Safety and efficacy of vildagliptin versus placebo in patients with type 2 diabetes and moderate or severe renal impairment: a prospective 24-week randomized placebo-controlled trial. *Diabetes Obes Metab* 2011;13:947-54.

47. Scirica BM, Bhatt DL, Braunwald E, Steg PG, Davidson J, Hirshberg B, *et al.* Saxagliptin and cardiovascular outcomes in patients with type 2 diabetes mellitus. *New Eng J Med* 2013;369:1317-26.
48. Hemmingsen B, Schroll JB, Lund SS, Wetterslev J, Gluud C, Vaag A, *et al.* Sulphonylurea monotherapy for patients with type 2 diabetes mellitus. *Cochrane Database Syst Rev* 2013;4:CD009008.
49. Feinbock C, Luger A, Klingler A, Egger T, Bielez G, Winkler F, *et al.* Prospective multicentre trial comparing the efficacy of, and compliance with, glimepiride or acarbose treatment in patients with type 2 diabetes not controlled with diet alone. *Diabetes Nutr Metab* 2003;16:214-21.
50. Hermann LS, Schersten B, Bitzen PO, Kjellstrom T, Lindgarde F, Melander A. Therapeutic comparison of metformin and sulfonylurea, alone and in various combinations. A double-blind controlled study. *Diabetes Care* 1994;17:1100-9.
51. Rosenthal JH, Mauersberger H. Effects on blood pressure of the alpha-glucosidase inhibitor acarbose compared with the insulin enhancer glibenclamide in patients with hypertension and type 2 diabetes mellitus. *Clin Drug Investig* 2002;22:701.
52. Segal P, Feig PU, Schernthaner G, Ratzmann KP, Rybka J, Petzinna D, *et al.* The efficacy and safety of miglitol therapy compared with glibenclamide in patients with NIDDM inadequately controlled by diet alone. *Diabetes Care* 1997;20:687-91.
53. Shihara N, Kitaoka M, Inagaki N, Kadowaki T, Koumoto S, Satoh J, *et al.* Randomized controlled trial of single-agent glimepiride and pioglitazone in Japanese patients with type 2 diabetes: A comparative study. *J Diabetes Investig* 2011;2:391-8.
54. Spengler M, Hänsel G, Boehme K. Efficacy of 6 months monotherapy with glucosidase inhibitor Acarbose versus sulphonylurea glibenclamide on metabolic control of dietary treated type II diabetics (NIDDM). *Horm Metab Res Suppl*;26:50-1.
55. Tosi F, Muggeo M, Brun E, Spiazzi G, Perobelli L, Zanolin E, *et al.* Combination treatment with metformin and glibenclamide versus single-drug therapies in type 2 diabetes mellitus: a randomized, double-blind, comparative study. *Metabolism* 2003;52:862-7.
56. DeFronzo RA, Goodman AM. Efficacy of metformin in patients with non-insulin-dependent diabetes mellitus. The Multicenter Metformin Study Group. *N Engl J Med* 1995;333:541-9.
57. Charbonnel B, Roden M, Urquhart R, Mariz S, Johns D, Mihm M, *et al.* Pioglitazone elicits long-term improvements in insulin sensitivity in patients with type 2 diabetes: comparisons with gliclazide-based regimens. *Diabetologia* 2005;48:553-60.
58. Hanefeld M, Patwardhan R, Jones NP, Rosiglitazone Clinical Trials Study G. A one-year study comparing the efficacy and safety of rosiglitazone and glibenclamide in the treatment of type 2 diabetes. *Nutr Metab Cardiovasc Dis* 2007;17:13-23.
59. Kaku K, Rasmussen MF, Nishida T, Seino Y. Fifty-two-week, randomized, multicenter trial to compare the safety and efficacy of the novel glucagon-like peptide-1 analog liraglutide vs glibenclamide in patients with type 2 diabetes. *J Diabetes Investig* 2011;2:441-7.
60. Nakamura T, Sugaya T, Kawagoe Y, Ueda Y, Koide H. Effect of pioglitazone on urinary liver-type fatty acid-binding protein concentrations in diabetes patients with microalbuminuria. *Diabetes Metab Res Rev* 2006;22:385-9.
61. Nathan DM, Rousell A, Godine JE. Glyburide or insulin for metabolic control in non-insulin-dependent diabetes mellitus. A randomized, double-blind study. *Ann Intern Med* 1988;108:334-40.
62. St John Sutton M, Rendell M, Dandona P, Dole JF, Murphy K, Patwardhan R, *et al.* A comparison of the effects of rosiglitazone and glyburide on cardiovascular function

- and glyceemic control in patients with type 2 diabetes. *Diabetes Care* 2002;25:2058-64.
63. Tan MH, Johns D, Strand J, Halse J, Madsbad S, Eriksson JW, *et al.* Sustained effects of pioglitazone vs. glibenclamide on insulin sensitivity, glycaemic control, and lipid profiles in patients with Type 2 diabetes. *Diabet Med* 2004;21:859-66.
  64. van de Laar FA, Lucassen PL, Kemp J, van de Lisdonk EH, van Weel C, Rutten GE. Is acarbose equivalent to tolbutamide as first treatment for newly diagnosed type 2 diabetes in general practice? A randomised controlled trial. *Diabetes Res Clin Pract* 2004;63:57-65.
  65. Kahn SE, Haffner SM, Heise MA, Herman WH, Holman RR, Jones NP, *et al.* Glycemic durability of rosiglitazone, metformin, or glyburide monotherapy. *N Engl J Med* 2006;355:2427-43.
  66. Alvarsson M, Berntorp K, Fernqvist-Forbes E, Lager I, Steen L, Orn T, *et al.* Effects of insulin versus sulphonylurea on beta-cell secretion in recently diagnosed type 2 diabetes patients: a 6-year follow-up study. *Rev Diabet Stud* 2010;7:225-32.
  67. Gerstein HC, Ratner RE, Cannon CP, Serruys PW, Garcia-Garcia HM, van Es GA, *et al.* Effect of rosiglitazone on progression of coronary atherosclerosis in patients with type 2 diabetes mellitus and coronary artery disease: the assessment on the prevention of progression by rosiglitazone on atherosclerosis in diabetes patients with cardiovascular history trial. *Circulation* 2010;121:1176-87.
  68. Birkeland KI, Furuseth K, Melander A, Mowinckel P, Vaaler S. Long-term randomized placebo-controlled double-blind therapeutic comparison of glipizide and glyburide. Glycemic control and insulin secretion during 15 months. *Diabetes Care* 1994;17:45-9.
  69. Birkeland KI, Hanssen KF, Urdal P, Berg K, Vaaler S. A long-term, randomized, comparative study of insulin versus sulfonylurea therapy in type 2 diabetes. *J Intern Med* 1994;236:305-13.
  70. Derosa G, Franzetti I, Gadaleta G, Ciccarelli L, Fogari R. Metabolic variations with oral antidiabetic drugs in patients with Type 2 diabetes: comparison between glimepiride and metformin. *Diabetes Nutr Metab* 2004;17:143-50.
  71. Foley JE, Sreenan S. Efficacy and safety comparison between the DPP-4 inhibitor vildagliptin and the sulfonylurea gliclazide after two years of monotherapy in drug-naive patients with type 2 diabetes. *Horm Metab Res* 2009;41:905-9.
  72. Jain R, Osei K, Kupfer S, Perez AT, Zhang J. Long-term safety of pioglitazone versus glyburide in patients with recently diagnosed type 2 diabetes mellitus. *Pharmacotherapy* 2006;26:1388-95.
  73. Garber A, Henry RR, Ratner R, Hale P, Chang CT, Bode B, *et al.* Liraglutide, a once-daily human glucagon-like peptide 1 analogue, provides sustained improvements in glycaemic control and weight for 2 years as monotherapy compared with glimepiride in patients with type 2 diabetes. *Diabetes Obes Metab* 2011;13:348-56.
  74. Intensive blood-glucose control with sulphonylureas or insulin compared with conventional treatment and risk of complications in patients with type 2 diabetes (UKPDS 33). UK Prospective Diabetes Study (UKPDS) Group. *Lancet* 1998;352:837-53.
  75. Effect of intensive blood-glucose control with metformin on complications in overweight patients with type 2 diabetes (UKPDS 34). UK Prospective Diabetes Study (UKPDS) Group. *Lancet* 1998;352:854-65.
  76. Barnett AH, Huisman H, Jones R, von Eynatten M, Patel S, Woerle HJ. Linagliptin for patients aged 70 years or older with type 2 diabetes inadequately controlled with

- common antidiabetes treatments: a randomised, double-blind, placebo-controlled trial. *Lancet* 2013;382:1381-58.
77. Chacra AR, Tan GH, Apanovitch A, Ravichandran S, List J, Chen R. Saxagliptin added to a submaximal dose of sulphonylurea improves glycaemic control compared with uptitration of sulphonylurea in patients with type 2 diabetes: a randomised controlled trial. *Int J Clin Pract* 2009;63:1395-406.
  78. Garber AJ, Foley JE, Banerji MA, Ebeling P, Gudbjornsdottir S, Camisasca RP, *et al.* Effects of vildagliptin on glucose control in patients with type 2 diabetes inadequately controlled with a sulphonylurea. *Diabetes Obes Metab* 2008;10:1047-56.
  79. Hermansen K, Kipnes M, Luo E, Fanurik D, Khatami H, Stein P. Efficacy and safety of the dipeptidyl peptidase-4 inhibitor, sitagliptin, in patients with type 2 diabetes mellitus inadequately controlled on glimepiride alone or on glimepiride and metformin. *Diabetes Obes Metab* 2007;9:733-45.
  80. Kikuchi M, Haneda M, Koya D, Tobe K, Onishi Y, Couturier A, *et al.* Efficacy and tolerability of vildagliptin as an add-on to glimepiride in Japanese patients with Type 2 diabetes mellitus. *Diabetes Res Clin Pract* 2010;89:216-23.
  81. Lewin AJ, Arvay L, Liu D, Patel S, von Eynatten M, Woerle HJ. Efficacy and tolerability of linagliptin added to a sulphonylurea regimen in patients with inadequately controlled type 2 diabetes mellitus: an 18-week, multicenter, randomized, double-blind, placebo-controlled trial. *Clin Ther* 2012;34:1909-19 e15.
  82. Owens DR, Swallow R, Dugi KA, Woerle HJ. Efficacy and safety of linagliptin in persons with Type 2 diabetes inadequately controlled by a combination of metformin and sulphonylurea: A 24-week randomized study. *Diabetic Med* 2011;28:1352-61.
  83. Pratley RE, Kipnes MS, Fleck PR, Wilson C, Mekki Q. Efficacy and safety of the dipeptidyl peptidase-4 inhibitor alogliptin in patients with type 2 diabetes inadequately controlled by glyburide monotherapy. *Diabetes Obes Metab* 2009;11:167-76.
  84. Seino Y, Hiroi S, Hirayama M, Kaku K. Efficacy and safety of alogliptin added to sulphonylurea in Japanese patients with type 2 diabetes: A randomized, double-blind, placebo-controlled trial with an open-label, long-term extension study. *J Diabetes Investig* 2012;3:517-25.
  85. White WB, Cannon CP, Heller SR, Nissen SE, Bergenstal RM, Bakris GL, *et al.* Alogliptin after acute coronary syndrome in patients with type 2 diabetes. *New Eng J Med* 2013;369:1327-35.
